# Supplementary material for: Prevention of Oxidized Low Density Lipoprotein-Induced Endothelial Cell Injury by DA-PLGA-PEG-cRGD Nanoparticles Combined with Ultrasound
Source: Int J Mol Sci. 2017 Apr 13;18(4):815. doi: 10.3390/ijms18040815 (PMC5412399; doi:10.3390/ijms18040815)
Supplement: Supplementary file 1 [file ijms-18-00815-s001.pdf]

## Supplementary Materials

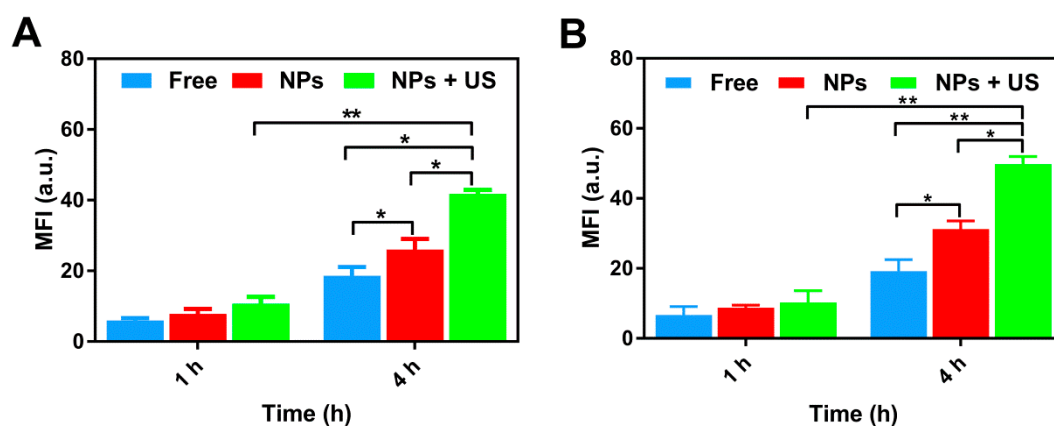

**Figure S1.** Cellular uptake of drug in damaged HUVEC cells. (A) Quantification of confocal microscopy images of intracellular FITC distribution in damaged HUVEC cells after FITC, FITC@DA-PLGA-PEG-cRGD NPs and FITC@DA-PLGA-PEG-cRGD NPs + US treatment for 1 and 4 h; (B) Flow cytometry analyses of damaged HUVEC cells incubated with FITC, FITC@DA-PLGA-PEG-cRGD NPs and FITC@DA-PLGA-PEG-cRGD NPs + US for 1 and 4 h. Data shown as mean  $\pm$  SD. ( $n = 3$ ). \*\*  $p < 0.001$ , \*  $p < 0.05$ .

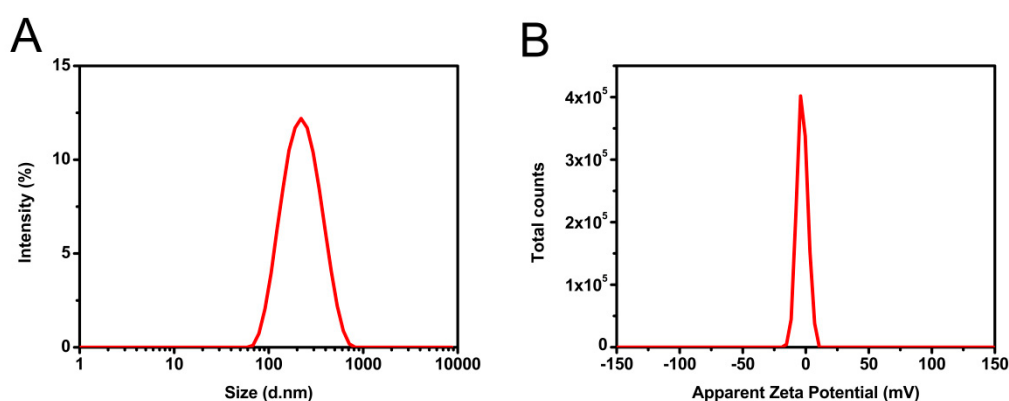

**Figure S2.** Characterization of DA-PLGA-PEG NPs. (A) Particle size distribution of DA-PLGA-PEG NPs measured by DLS and weighted by intensity. (B) Apparent zeta potential of DA-PLGA-PEG NPs observed.
